# Supplementary material for: Single-Cell RNA Transcriptome Helps Define the Limbal/Corneal Epithelial Stem/Early Transit Amplifying Cells and How Autophagy Affects This Population
Source: PubMed Central journal article supplement — Invest Ophthalmol Vis Sci. 2019 Aug;60(10):3570–83. doi: 10.1167/iovs.19-27656 (PMC6701873; doi:10.1167/iovs.19-27656), 2019-08
Supplement: iovs-60-10-02_s03.pdf [file iovs-60-10-02_s03.pdf]

## Supplementary Figure S1

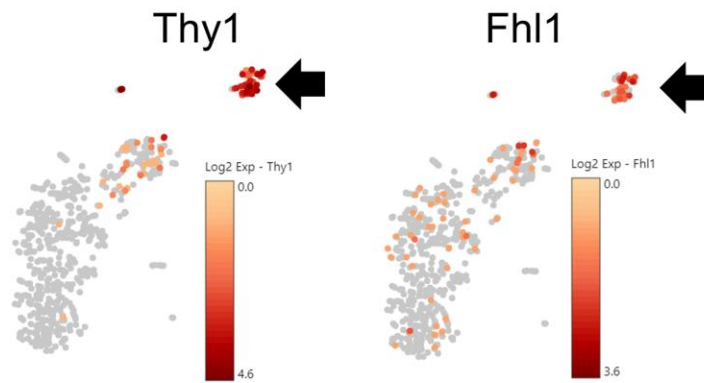

Supplementary Figure S1. t-SNEs colored by the normalized log-transformed expression of the corneal stromal stem cell markers *Thy1* and *Fhl1*. Raw sequencing data was analyzed using the 10X Genomics data analysis pipeline. Image was exported via the Loupe program.
