# Supplementary material for: Single-Cell RNA Transcriptome Helps Define the Limbal/Corneal Epithelial Stem/Early Transit Amplifying Cells and How Autophagy Affects This Population
Source: PubMed Central journal article supplement — Invest Ophthalmol Vis Sci. 2019 Aug;60(10):3570–83. doi: 10.1167/iovs.19-27656 (PMC6701873; doi:10.1167/iovs.19-27656), 2019-08
Supplement: iovs-60-10-02_s04.pdf [file iovs-60-10-02_s04.pdf]

## Supplementary Figure S2

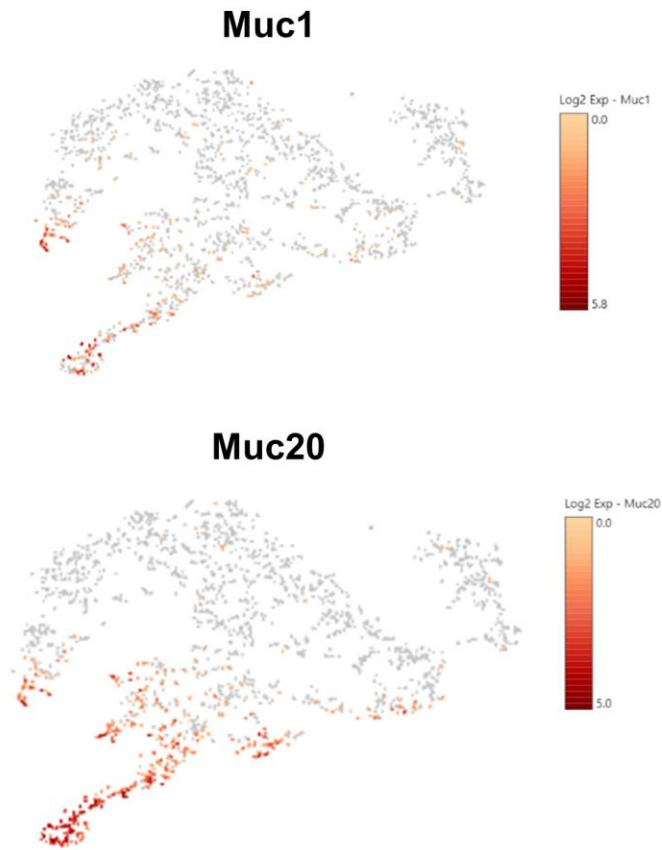

Supplementary Figure S2. t-SNEs colored by the normalized log-transformed expression of conjunctival epithelial markers *Muc1* and *Muc20*. Raw sequencing data was analyzed using 10X Genomics data analysis pipeline. Image was exported via Loupe program.
