# Supplementary material for: Single-Cell RNA Transcriptome Helps Define the Limbal/Corneal Epithelial Stem/Early Transit Amplifying Cells and How Autophagy Affects This Population
Source: PubMed Central journal article supplement — Invest Ophthalmol Vis Sci. 2019 Aug;60(10):3570–83. doi: 10.1167/iovs.19-27656 (PMC6701873; doi:10.1167/iovs.19-27656), 2019-08
Supplement: iovs-60-10-02_s05.pdf [file iovs-60-10-02_s05.pdf]

## Supplementary Figure S3

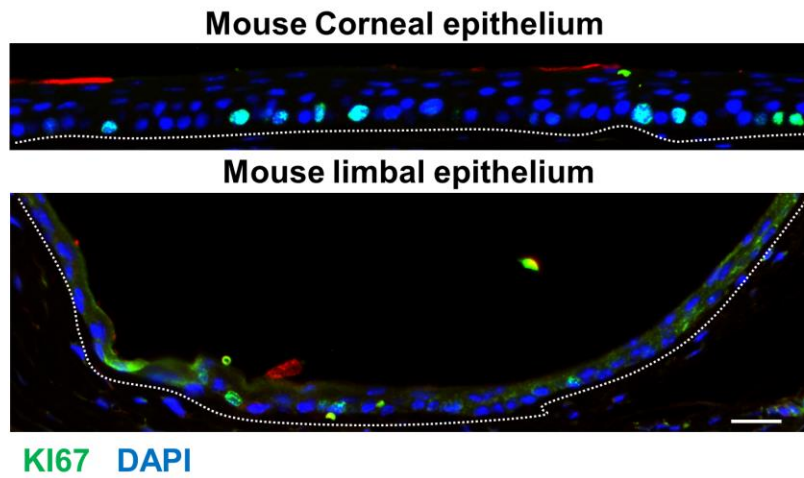

Supplementary Figure S3. Immunofluorescence staining with KI67 antibody in a frozen section of mouse limbal and corneal epithelium. KI67 was strongly localized in the nuclei of cells in the corneal epithelial basal layer compared to basal cells in the limbal epithelium. Scale bar= 20 $\mu$ m. Dotted lines mark the basement membrane. N=5.
