# Supplementary material for: Single-Cell RNA Transcriptome Helps Define the Limbal/Corneal Epithelial Stem/Early Transit Amplifying Cells and How Autophagy Affects This Population
Source: PubMed Central journal article supplement — Invest Ophthalmol Vis Sci. 2019 Aug;60(10):3570–83. doi: 10.1167/iovs.19-27656 (PMC6701873; doi:10.1167/iovs.19-27656), 2019-08
Supplement: iovs-60-10-02_s06.pdf [file iovs-60-10-02_s06.pdf]

# Supplementary Figure S4

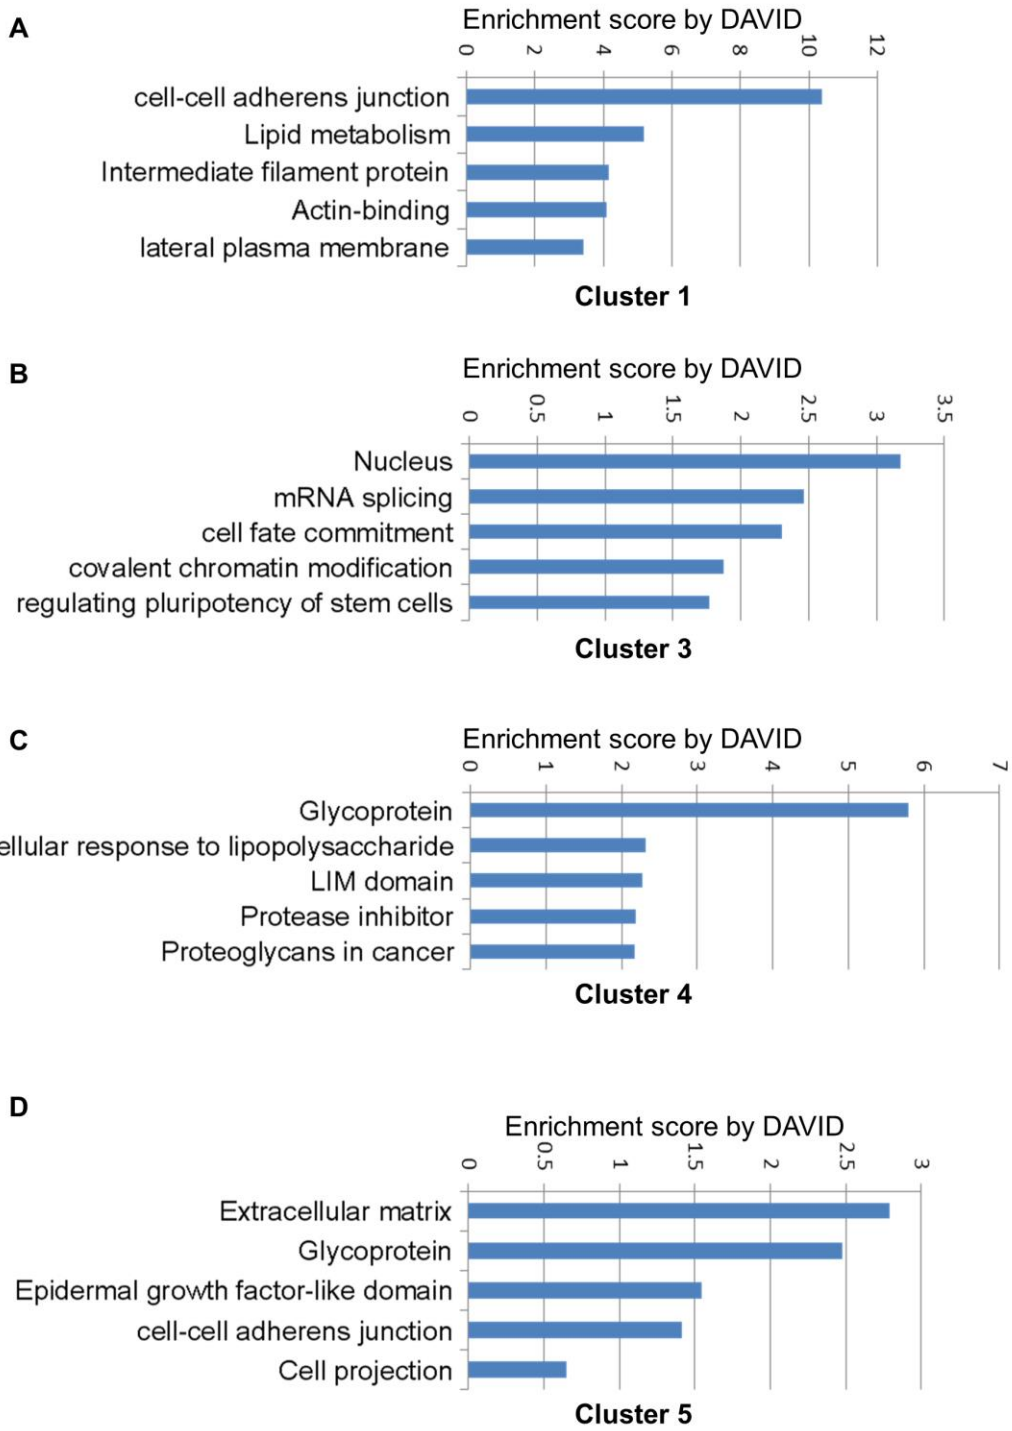

# Supplementary Figure S4, continued

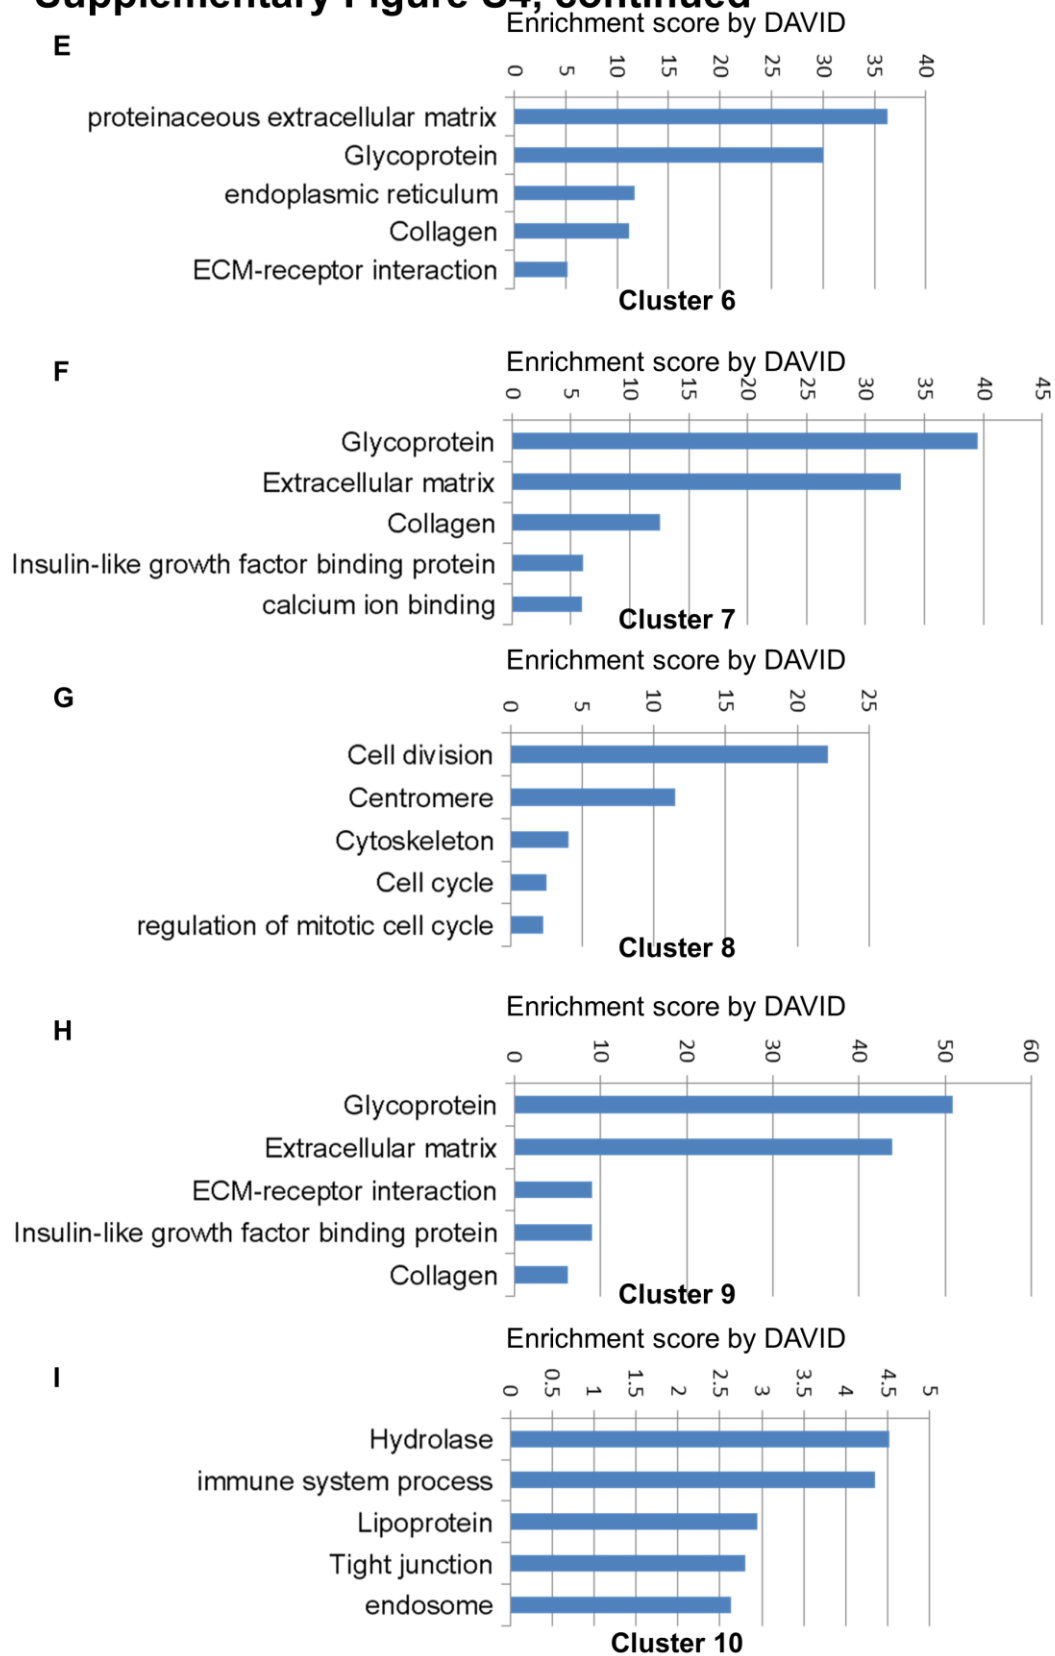

Supplementary Figure S4. Gene annotation enrichment analysis of each cluster showed functional differences between clusters. Enrichment score was analyzed using DAVID.
