# Supplementary material for: Single-Cell RNA Transcriptome Helps Define the Limbal/Corneal Epithelial Stem/Early Transit Amplifying Cells and How Autophagy Affects This Population
Source: PubMed Central journal article supplement — Invest Ophthalmol Vis Sci. 2019 Aug;60(10):3570–83. doi: 10.1167/iovs.19-27656 (PMC6701873; doi:10.1167/iovs.19-27656), 2019-08
Supplement: iovs-60-10-02_s07.pdf [file iovs-60-10-02_s07.pdf]

Supplementary Table S1. List of significant genes in stem/early TA cell population of corneal epithelium. Raw sequencing data was analyzed using 10X Genomics data analysis pipeline. The table was exported via the Loupe program.

Supplementary Table S2. List of significant genes in the mature TA cell population of corneal epithelium. Raw sequencing data was analyzed using 10X Genomics data analysis pipeline. The table was exported via Loupe program.

Supplementary Table S3. List of significant genes in cluster 9 of the integrated corneal epithelial cells from wild type and beclin 1<sup>+/-</sup> mice. Sequencing data from wild type and beclin 1<sup>+/-</sup> mice were integrated and analyzed using Seurat package in R.
